# Supplementary material for: Modelling the Cost-Effectiveness of Hepatitis A in South Africa
Source: MDPI journal article supplement (doi:10.3390/vaccines12020116), 2024-01-24
Supplement: s1 [file s1]

**Supplementary Table S1: Ordinary differential equations**

|                                                                                                                                                                                 |
|---------------------------------------------------------------------------------------------------------------------------------------------------------------------------------|
| $\frac{dM}{dt} = propM * mu * N - tau * M - d_1 * M - (1 - d_1) * age_1 * M$                                                                                                    |
| $\frac{dS_i}{dt} = (1 - propM) * mu * N + tau * M - propV * S_i * Vrate * (1 - propVF) - lambda_i * S_i - d_i * S_i - (1 - d_i) * age_i * S_i$                                  |
| $\frac{dV_i}{dt} = propV * S_i * Vrate * (1 - propVF) - d_i * V_i - (1 - d_i) * age_i * V_i$                                                                                    |
| $\frac{dE_i}{dt} = lambda_i * S_i - nu * propA_i * E_i - nu * (1 - propA_i) * E_i - d_i * E_i - (1 - d_i) * age_i * E_i$                                                        |
| $\frac{dA_i}{dt} = nu * propA_i * E_i - gamma * A_i - d_1 * A_i - (1 - d_1) * age_i * A_i$                                                                                      |
| $\frac{dSy_i}{dt} = nu * (1 - propA_i) * E_i - trt * propO_i * Sy_1 * trt * propH_i * Sy_1 - propF_i * trt * Sy_1 - d_i * Sy_i - (1 - d_i) * age_i * A_i$                       |
| $\frac{dO_i}{dt} = trt * propO_i * Sy_i - gamma * O_i - d_i * O_i - (1 - d_i) * age_i * O_i$                                                                                    |
| $\frac{dHi_i}{dt} = trt * propH_i * Sy_i - gamma * Hi_i - d_i * Hi_i - (1 - d_i) * age_i * Hi_i$                                                                                |
| $\frac{dHn_i}{dt} = gamma * Hi_i - gamma * Hn_i - d_i * Hn_i - (1 - d_i) * age_i * Hn_i$                                                                                        |
| $\frac{dALF_i}{dt} = propF_i * trt * Sy_i - (1 - propT_i) * propFD_i * Frate * Fu_i - propFR_i * Frate * Fu_i - propT_i * Frate * Fu_i - d_i * Fu_i - (1 - d_i) * age_i * Fu_i$ |
| $\frac{dALFd_i}{dt} = propFD_i * Frate * ALF_i - FDrate * ALFd_i - d_i * ALFd_i - (1 - d_i) * age_i * ALFd_i$                                                                   |
| $\frac{dALFr_i}{dt} = propFr_i * Frate * Fu_i - gammaF * ALFr_i - d_i * ALFr_i - (1 - d_i) * age_i * ALFr_i$                                                                    |
| $\frac{dALFt_i}{dt} = propT_i * Frate * Fu_i - propTD_1 * Trate * ALFt_i - (1 - propTD_i) * rate * T_i - d_i * T_i - (1 - d_i) * age_i * ALFt_i$                                |
| $\frac{dTd_i}{dt} = propTD_i * Trate * T_i - TDrate * Td_i - d_i * Td_i - (1 - d_i) * age_i * Td_i$                                                                             |
| $\frac{dTr_i}{dt} = (1 - propTD_i) * Trate * T_i - gammaT * Tr_i - d_i * Tr_i - (1 - d_i) * age_i * Tr_i$                                                                       |
| $\frac{dD_i}{dt} = TDrate * Td_i + FDrate * ALFd_i$                                                                                                                             |
| $\frac{dN_i}{dt} = gamma * A_i + gamma * O_i + gamma * Hn_i - Rrate * N_i - d_i * N_i - (1 - d_i) * age_i * N_i$                                                                |
| $\frac{dR_i}{dt} = Rrate * N_i + gammaF * Fr_i + gammaT * Tr_i - d_i * R_i - (1 - d_i) * age_i * R_i$                                                                           |

Supplementary Table S2: Daily contact matrix

|             |          | Age  |      |      |      |      |      |      |      |      |      |          |          |          |          |          |          |          |          |      |      |
|-------------|----------|------|------|------|------|------|------|------|------|------|------|----------|----------|----------|----------|----------|----------|----------|----------|------|------|
| A<br>g<br>e |          | 0    | 1    | 2    | 3    | 4    | 5    | 6    | 7    | 8    | 9    | 10 to 14 | 15 to 19 | 20 to 29 | 30 to 39 | 40 to 49 | 50 to 59 | 60 to 69 | 70 to 79 | 80+  |      |
|             | 0        | 0.13 | 0.13 | 0.13 | 0.12 | 0.12 | 0.13 | 0.13 | 0.13 | 0.12 | 0.12 | 0.17     | 0.11     | 0.46     | 0.52     | 0.20     | 0.13     | 0.06     | 0.02     | 0.00 |      |
|             | 1        | 0.13 | 0.13 | 0.12 | 0.12 | 0.12 | 0.13 | 0.13 | 0.13 | 0.12 | 0.12 | 0.17     | 0.11     | 0.46     | 0.52     | 0.19     | 0.13     | 0.06     | 0.02     | 0.00 |      |
|             | 2        | 0.13 | 0.12 | 0.12 | 0.12 | 0.12 | 0.13 | 0.13 | 0.13 | 0.12 | 0.12 | 0.17     | 0.11     | 0.45     | 0.51     | 0.19     | 0.13     | 0.06     | 0.02     | 0.00 |      |
|             | 3        | 0.12 | 0.12 | 0.12 | 0.12 | 0.12 | 0.12 | 0.12 | 0.12 | 0.12 | 0.12 | 0.17     | 0.11     | 0.45     | 0.51     | 0.19     | 0.13     | 0.06     | 0.02     | 0.00 |      |
|             | 4        | 0.12 | 0.12 | 0.12 | 0.12 | 0.12 | 0.12 | 0.12 | 0.12 | 0.12 | 0.11 | 0.17     | 0.11     | 0.44     | 0.50     | 0.19     | 0.13     | 0.06     | 0.02     | 0.00 |      |
|             | 5        | 0.06 | 0.06 | 0.06 | 0.06 | 0.06 | 0.06 | 0.06 | 0.06 | 0.06 | 0.05 | 0.41     | 0.12     | 0.27     | 0.47     | 0.26     | 0.09     | 0.05     | 0.01     | 0.00 |      |
|             | 6        | 0.06 | 0.06 | 0.06 | 0.06 | 0.06 | 0.06 | 0.06 | 0.06 | 0.06 | 0.06 | 0.41     | 0.12     | 0.28     | 0.48     | 0.26     | 0.09     | 0.05     | 0.01     | 0.00 |      |
|             | 7        | 0.06 | 0.06 | 0.06 | 0.06 | 0.06 | 0.06 | 0.06 | 0.06 | 0.06 | 0.05 | 0.41     | 0.12     | 0.27     | 0.47     | 0.26     | 0.09     | 0.05     | 0.01     | 0.00 |      |
|             | 8        | 0.06 | 0.06 | 0.06 | 0.05 | 0.05 | 0.06 | 0.06 | 0.06 | 0.06 | 0.05 | 0.40     | 0.11     | 0.27     | 0.46     | 0.25     | 0.09     | 0.05     | 0.01     | 0.00 |      |
|             | 9        | 0.05 | 0.05 | 0.05 | 0.05 | 0.05 | 0.05 | 0.06 | 0.05 | 0.05 | 0.05 | 0.38     | 0.11     | 0.26     | 0.44     | 0.24     | 0.09     | 0.05     | 0.01     | 0.00 |      |
|             | 10 to 14 | 0.12 | 0.12 | 0.12 | 0.11 | 0.11 | 0.12 | 0.12 | 0.12 | 0.11 | 0.11 | 12.55    | 1.31     | 1.22     | 1.60     | 1.46     | 0.42     | 0.17     | 0.07     | 0.02 |      |
|             | 15 to 19 | 0.07 | 0.07 | 0.07 | 0.07 | 0.07 | 0.07 | 0.07 | 0.07 | 0.07 | 0.07 | 3.74     | 9.68     | 3.30     | 1.56     | 1.75     | 0.58     | 0.16     | 0.04     | 0.01 |      |
|             | 20 to 29 | 0.13 | 0.13 | 0.13 | 0.13 | 0.12 | 0.13 | 0.13 | 0.13 | 0.13 | 0.12 | 0.12     | 0.95     | 5.04     | 16.20    | 6.20     | 3.84     | 2.04     | 0.53     | 0.08 | 0.02 |
|             | 30 to 39 | 0.24 | 0.24 | 0.23 | 0.23 | 0.23 | 0.24 | 0.24 | 0.24 | 0.24 | 0.23 | 0.22     | 2.37     | 1.38     | 6.41     | 8.32     | 4.64     | 1.84     | 0.68     | 0.10 | 0.02 |
|             | 40 to 49 | 0.23 | 0.22 | 0.22 | 0.22 | 0.21 | 0.22 | 0.23 | 0.22 | 0.22 | 0.21 | 2.25     | 2.50     | 3.75     | 4.94     | 5.00     | 1.79     | 0.53     | 0.10     | 0.02 |      |
|             | 50 to 59 | 0.20 | 0.20 | 0.20 | 0.19 | 0.19 | 0.20 | 0.20 | 0.20 | 0.19 | 0.19 | 1.93     | 1.89     | 3.57     | 3.18     | 3.11     | 2.19     | 0.67     | 0.11     | 0.03 |      |
|             | 60 to 69 | 0.14 | 0.14 | 0.14 | 0.14 | 0.13 | 0.14 | 0.14 | 0.14 | 0.14 | 0.13 | 1.11     | 0.84     | 1.92     | 2.61     | 1.84     | 1.33     | 0.96     | 0.18     | 0.02 |      |
|             | 70 to 79 | 0.08 | 0.08 | 0.08 | 0.08 | 0.08 | 0.08 | 0.09 | 0.08 | 0.08 | 0.08 | 1.20     | 0.95     | 0.65     | 0.98     | 1.13     | 0.77     | 0.56     | 0.34     | 0.09 |      |
| 80+         | 0.10     | 0.09 | 0.09 | 0.09 | 0.09 | 0.10 | 0.10 | 0.09 | 0.09 | 0.09 | 0.60 | 0.48     | 0.26     | 0.41     | 0.51     | 0.38     | 0.19     | 0.12     | 0.04     |      |      |

**Supplementary Table S3: Cost-effectiveness of modelled scenarios referencing previous undominated approach (2023-2030)**

| Scenario                                                                                                                                                                                                                                                | Total Costs     | Incremental Costs | Total DALYs | DALYs averted | Incr. Cost per DALY averted |
|---------------------------------------------------------------------------------------------------------------------------------------------------------------------------------------------------------------------------------------------------------|-----------------|-------------------|-------------|---------------|-----------------------------|
| Baseline                                                                                                                                                                                                                                                | \$1,530,392,760 |                   | 27,137      |               |                             |
| 1                                                                                                                                                                                                                                                       | \$1,714,015,277 | \$183,622,517     | 18,396      | 8,741         | \$21,007                    |
| 2                                                                                                                                                                                                                                                       | \$2,009,207,209 | \$295,191,932     | 18,266      | 130           | \$2,270,707                 |
| 3                                                                                                                                                                                                                                                       | \$2,195,073,864 | \$185,866,655     | 18,440      | -174          | (\$1,068,199)               |
| 4                                                                                                                                                                                                                                                       | \$2,851,373,642 | \$656,299,778     | 19,151      | -711          | (\$923,066)                 |
| <p><i>The Incremental costs and DALYs averted presented in this table are calculated by referencing the previous undominated and less costly scenario.</i></p> <p><i>Abbreviations: Incr. = incremental; DALYs = Disability adjusted life years</i></p> |                 |                   |             |               |                             |

Supplementary Table S4: One-way sensitivity analysis for Scenario 1 ICER Results

| One-way sensitivity analysis       | Scenario 1 Total Cost | DALYS averted against baseline | Incr. cost per DALY averted against baseline |
|------------------------------------|-----------------------|--------------------------------|----------------------------------------------|
| Cost of clinic visit removed       | \$1,128,653,105       | 18,396                         | \$45,958                                     |
| Access to liver transplant at 0%   | \$1,531,224,497       | 18,396                         | -\$31,048                                    |
| Access to liver transplant at 100% | \$2,140,527,097       | 18,396                         | \$2,426                                      |
| Discount rate at 0%                | \$2,025,301,242       | 20,984                         | -\$19,972                                    |
| Discount rate at 10%               | \$1,477,986,262       | 16,406                         | -\$22,079                                    |
